# Supplementary material
Source: Royal Society of Chemistry journal article supplement (doi:10.1039/d6cp00991c)
Supplement: d6cp00991c1.pdf [file d6cp00991c1.pdf]

## Supporting Information

### Crystal-Phase Engineering of $\text{ZrS}_2/\gamma\text{-BC}_6\text{N}$ Heterostructures for Enhanced Type-II Photocatalytic Water Splitting

Peng Zhang,<sup>1</sup> Jiashuo Zhang,<sup>1</sup> Junhui Li<sup>1</sup> and Tongtong Li<sup>1\*</sup>

<sup>1</sup> China-Uzbekistan Joint Laboratory on Advanced Porous Materials, School of Materials Science and Engineering, Zhejiang Sci-Tech University, Hangzhou 310018, China.

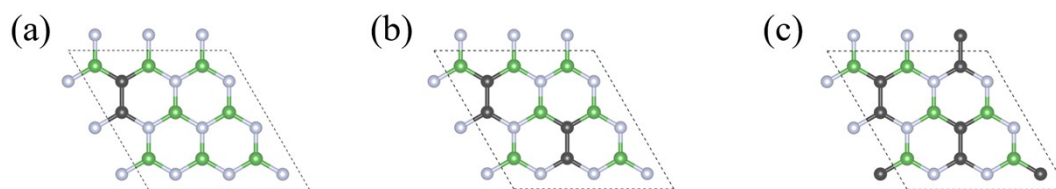

Fig.S1. (a-c) are top-down views of the single-layer structures  $\text{h-BC}_x\text{N}$  ( $x = 2, 4, 6$ ) respectively.

---

\*Corresponding Authors: Tongtong Li(yitaji@zstu.edu.cn)

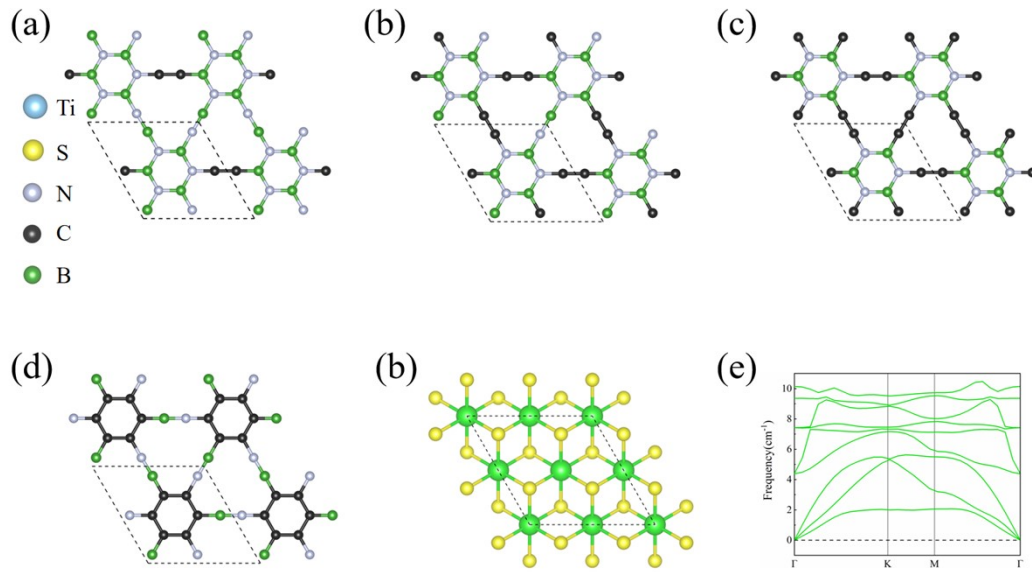

Fig.S2. (a–d) are top-down views of  $\gamma$ -BC<sub>x</sub>N monolayer structures ( $x = 2, 4, 6$ ), respectively. (e) and (f) are top-down views of the ZrS<sub>2</sub> monolayer structure and the corresponding high-symmetry  $K$ -path ( $\Gamma \rightarrow K \rightarrow M \rightarrow \Gamma$ ) phonon dispersion relations, respectively.

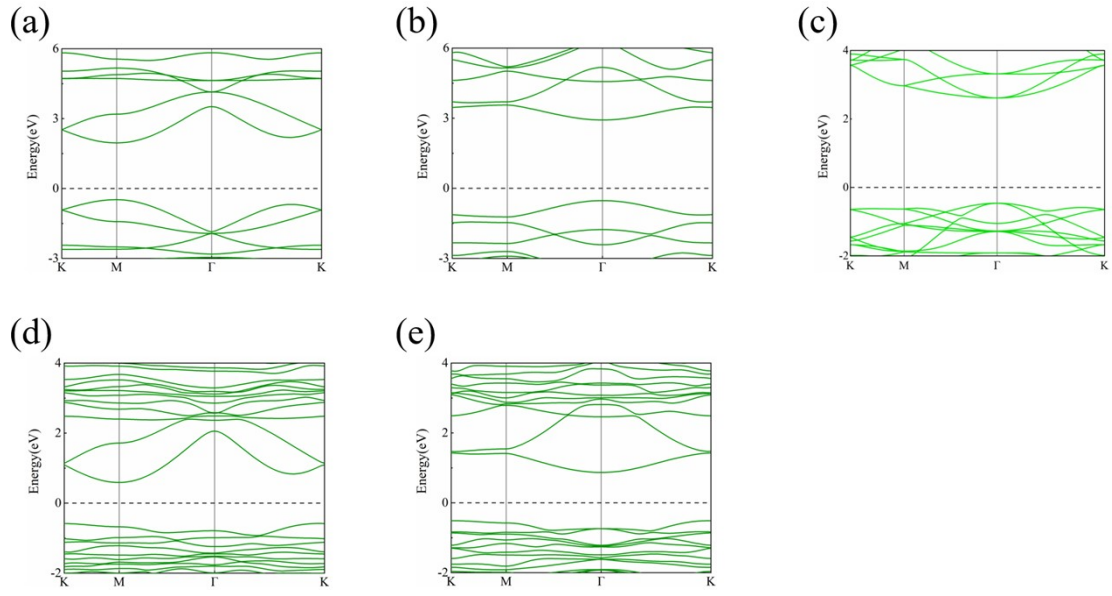

Fig.S3. (a-e) represent the band structures of  $\gamma$ -BC<sub>6</sub>N, h-BC<sub>4</sub>N, and monolayer ZrS<sub>2</sub>; and the heterostructures ZrS<sub>2</sub>/ $\gamma$ -BC<sub>6</sub>N and ZrS<sub>2</sub>/h-BC<sub>4</sub>N, respectively, as calculated by the PBE method.

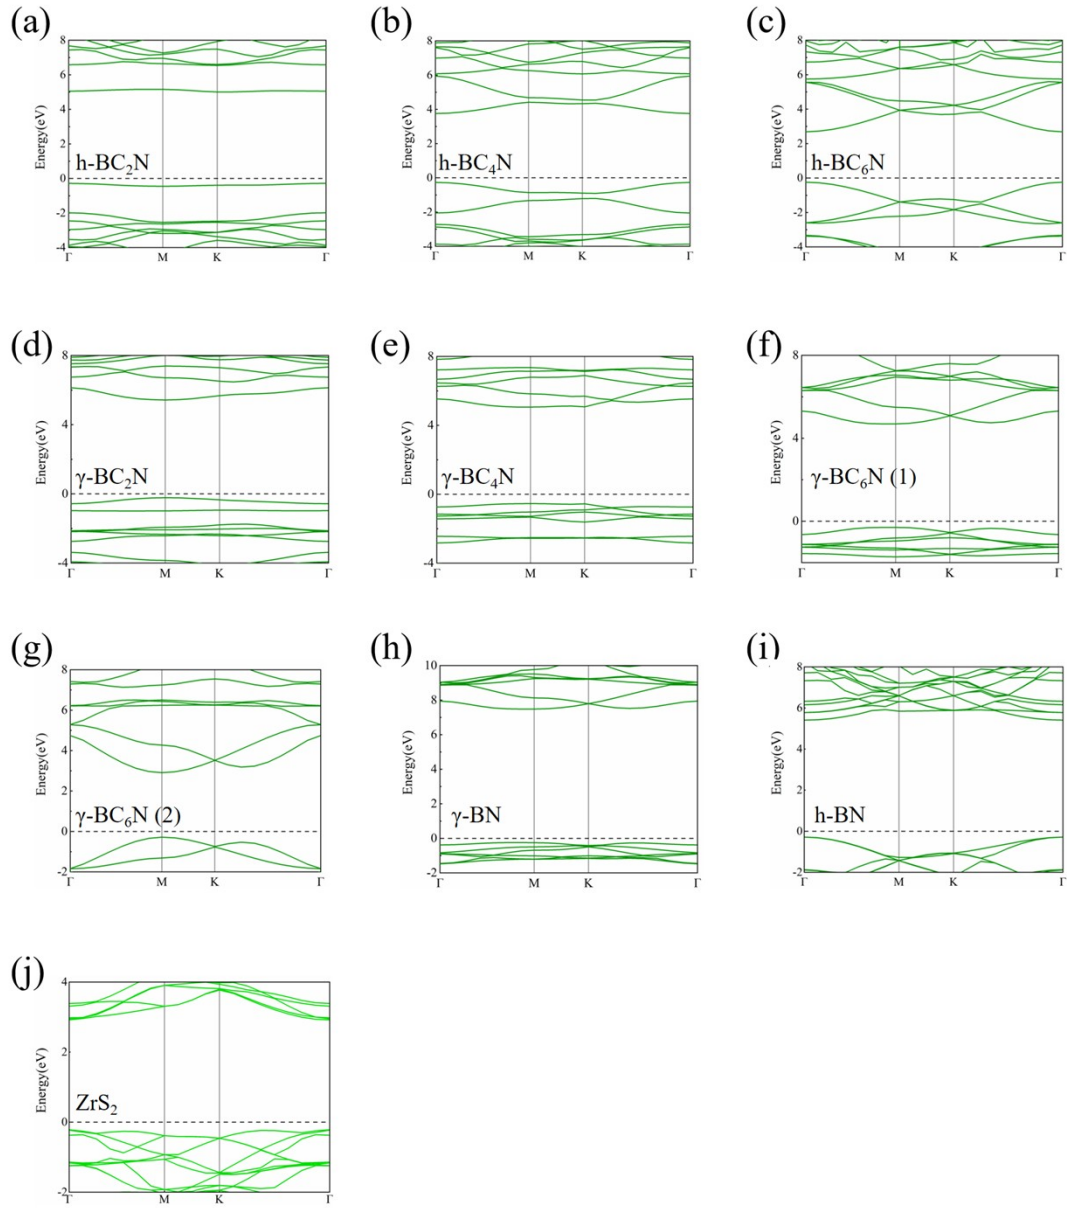

Fig.S4. (a-j) represent the band structure diagrams for each monolayer under the HSE06 method.

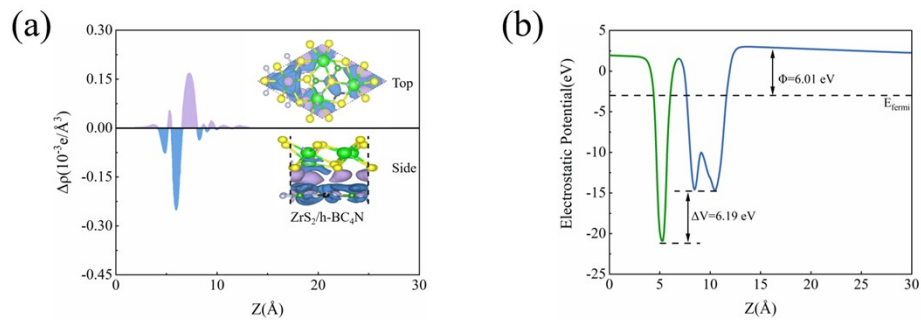

Fig.S5. (a) Charge density distribution map of the  $\text{ZrS}_2/\text{h-BC}_4\text{N}$  heterostructures (blue and purple in the inset denote charge accumulation and loss respectively). (b) Electrostatic potential distribution map of the  $\text{ZrS}_2/\text{h-BC}_4\text{N}$  heterostructures.

**Table S1.** The energy of CBM and VBM ( $E_{\text{CBM}}$  and  $E_{\text{VBM}}$ ), the overpotentials of HER and OER ( $\chi(\text{H}_2)$  and  $\chi(\text{O}_2)$ ), the calculated  $E_g$  ( $E_{\text{g-HSE06}}$ ) of HSE06, and the energy conversion efficiency  $\eta_{\text{STH}}$  of STH at the band-edge position of the different heterostructures under different strains

|                                                | Water splitting edges |                       | $\chi(\text{H}_2)$<br>(eV) | $\chi(\text{O}_2)$<br>(eV) | $E_{\text{g-HSE06}}$<br>(eV) | $\eta_{\text{STH}}$<br>(%) |
|------------------------------------------------|-----------------------|-----------------------|----------------------------|----------------------------|------------------------------|----------------------------|
|                                                | $E_{\text{CBM}}$ (eV) | $E_{\text{VBM}}$ (eV) |                            |                            |                              |                            |
| ZrS <sub>2</sub> / $\gamma$ -BC <sub>6</sub> N | -4.23                 | -5.64                 | 1.62                       | 0.33                       | 2.3                          | 15.54                      |
| ZrS <sub>2</sub> / $\gamma$ -BN                | -3.92                 | -5.60                 | 2.2                        | 2.05                       | 3.11                         | 5.04                       |
| ZrS <sub>2</sub> /h-BC <sub>4</sub> N          | -3.94                 | -5.69                 | 0.71                       | 0.86                       | 3.06                         | 5.8                        |
| ZrS <sub>2</sub> /h-BN                         | -4.08                 | -5.79                 | 0.5                        | 0.51                       | 3.55                         | 1.15                       |

**Table S2.** Band gaps( $E_g$ ), CBO, power conversion efficiency (PCE) and absorption coefficient of different heterostructures.

|                                                | $E_g$ | CBO  | PCE    | Absorption Coefficient             |
|------------------------------------------------|-------|------|--------|------------------------------------|
| ZrS <sub>2</sub> / $\gamma$ -BC <sub>6</sub> N | 2.3   | 0.2  | 10.5%  | $4.10 \times 10^5 \text{ cm}^{-1}$ |
| ZrS <sub>2</sub> / $\gamma$ -BN                | 3.06  | 0.33 | 4.78%  | $1.80 \times 10^5 \text{ cm}^{-1}$ |
| ZrS <sub>2</sub> /h-BC <sub>4</sub> N          | 3.55  | 0.3  | 2.45%  | $2.80 \times 10^5 \text{ cm}^{-1}$ |
| ZrS <sub>2</sub> /h-BN                         | 2.77  | 0.27 | 10.37% | $1.73 \times 10^5 \text{ cm}^{-1}$ |

**Table S3.** Defect formation energy

|                             | Energy(eV)  |
|-----------------------------|-------------|
| $\gamma$ -BC <sub>2</sub> N | -1.34250782 |
| $\gamma$ -BC <sub>4</sub> N | -4.01080547 |
| $\gamma$ -BC <sub>6</sub> N | -9.46246252 |
